# Supplementary material
Source: ML conference proceedings conference paper supplement (https://openaccess.thecvf.com/content/WACV2021/html/Nekoui_EAGLE-Eye_Extreme-Pose_Action_WACV_2021_paper.html)
Supplement: Supplementary file 2 [file Nekoui_EAGLE-Eye_Extreme-Pose_Action_WACV_2021_supplemental.zip]

Archive with 2 entries (2 files):
- 1262-supp.mp4
- 1262-supp.pdf
